# Supplementary material for: A metal–organic framework complex for enhancing tumor treatments through synergistic effect of chemotherapy and photodynamic therapy
Source: Royal Society of Chemistry journal article supplement (doi:10.1039/d3tb01592k), 2023-01-01
Supplement: d3tb01592k1.pdf [file d3tb01592k1.pdf]

## Supporting Information

### **Metal-organic frameworks complex for enhancing tumor treatment effect through synergistic attack of chemotherapy and photodynamic therapy**

Xiang Jiang<sup>1,2</sup>, Yuewu Zhao<sup>\*1</sup>, Shengkai Sun<sup>1</sup>, Li Wang<sup>1</sup>, Lina Sun<sup>1</sup>, Wenjing Li<sup>1</sup>, Zheng Wang<sup>1</sup>,

Jine Wang<sup>\*1,2,3</sup>, and Renjun Pei<sup>\*1</sup>

<sup>1</sup>CAS Key Laboratory of Nano-Bio Interface, Suzhou Institute of Nano-Tech and Nano-Bionics, Chinese Academy of Sciences, Suzhou, 215123, China.

<sup>2</sup>College of Mechanics and Materials, Hohai University, Nanjing, 210098, China.

<sup>3</sup>Jiangxi Institute of Nanotechnology, Nanchang, 330200, China.

\*Corresponding author: ywzhao2017@sinano.ac.cn;

jewang2012@sinano.ac.cn;

rjpei2011@sinano.ac.cn

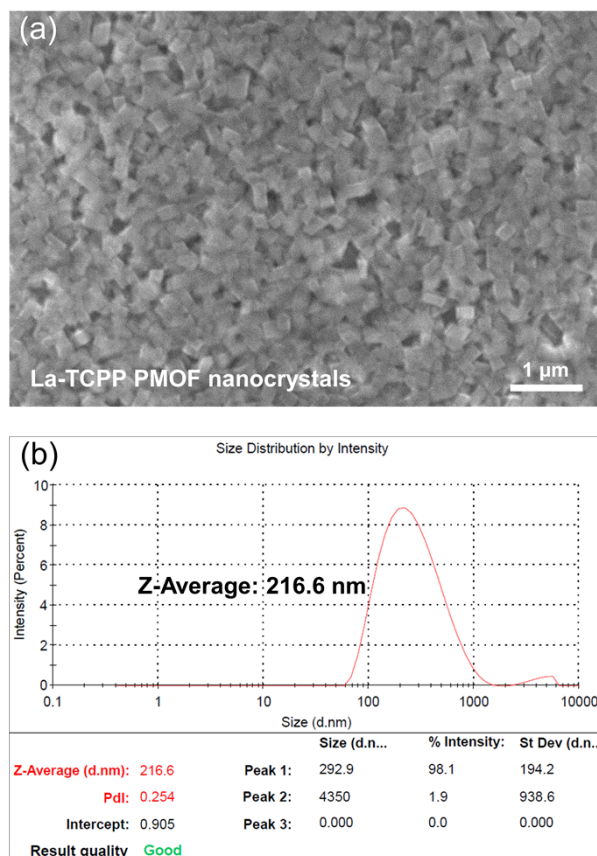

**Figure S1.** (a) SEM image and (b) DLS analysis of the prepared La-TCPP PMOF nanocrystals.

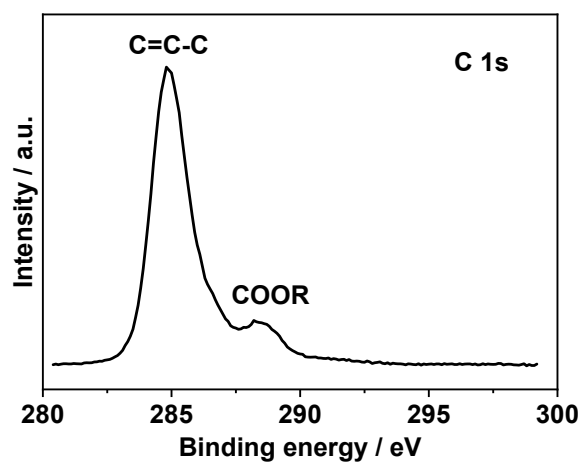

**Figure S2.** C 1s spectra of the prepared La-TCPP PMOF nanocrystals.

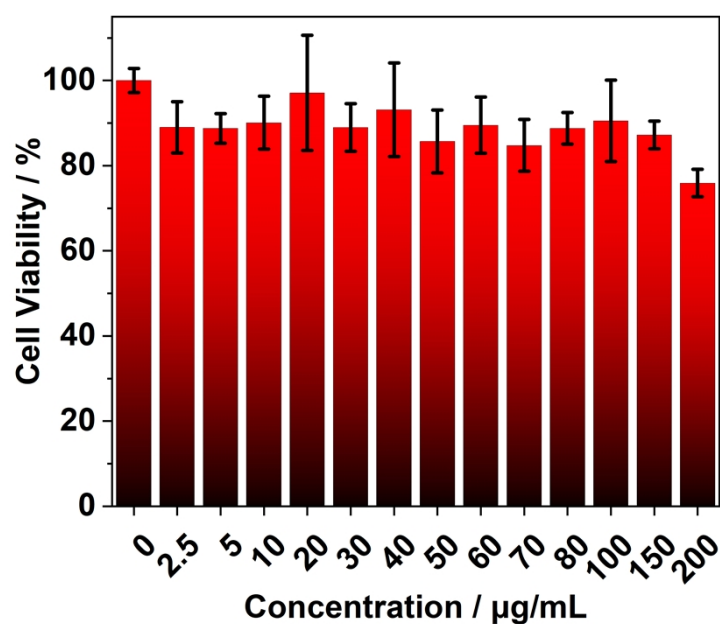

**Figure S3.** Cytotoxicity induced by La-TCPP PMOF nanocrystals in 4T1 cells.

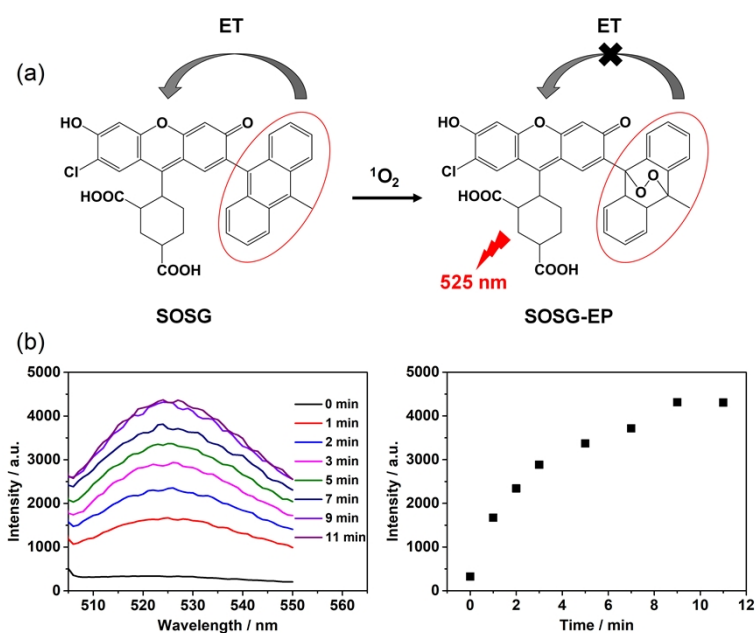

**Figure S4.** (a) The corresponding reaction formula and (b) fluorescence intensity curve of SOSG (2  $\mu\text{mol/L}$ ) were obtained in the presence of La-TCPP (5  $\mu\text{g/mL}$ ) at 660 nm light with a power density of 100  $\text{mW/cm}^2$ .

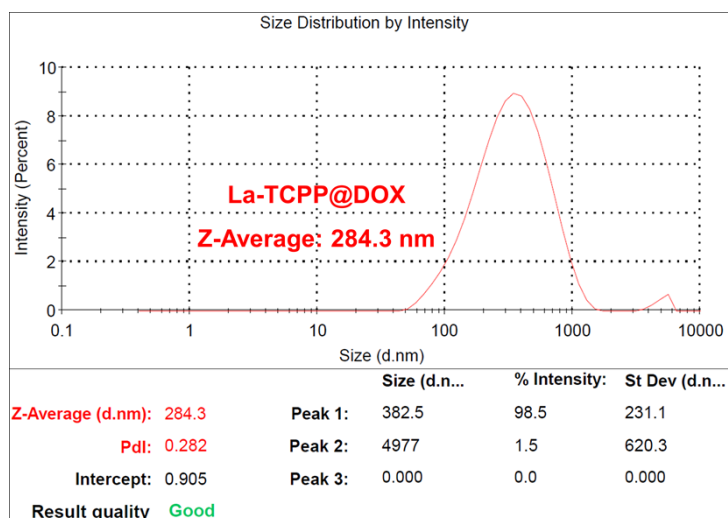

**Figure S5.** DLS analysis of the obtained La-TCPP@DOX nanocrystals.

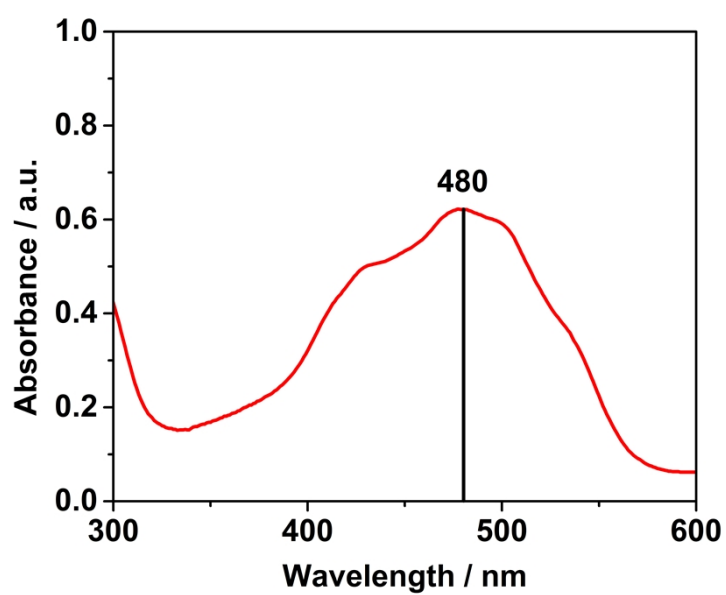

**Figure S6.** The UV-vis absorption of residual fluid obtained after DOX adsorption with La-TCPP PMOF nanocrystals.

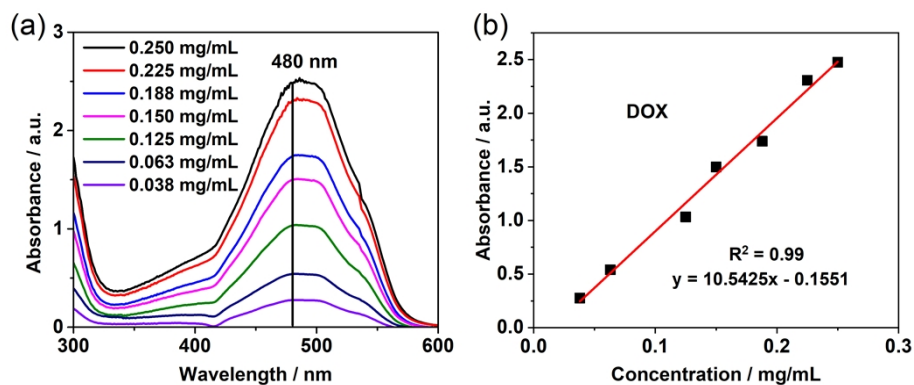

**Figure S7.** (a) UV-vis absorption curves and (b) correlation linearity of the DOX with different concentrations.

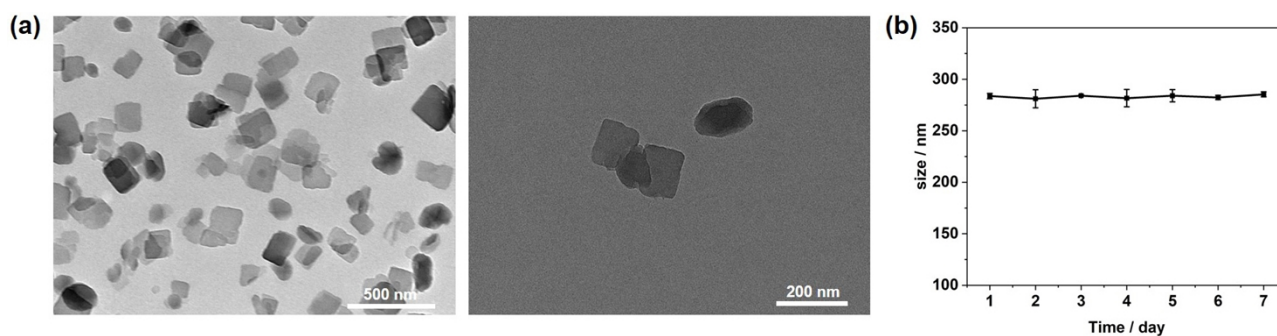

**Figure S8.** (a) TEM images of La-TCPP@DOX PMOF after 7 days of DOX loading. (b) DLS analysis of the long-term hydrodynamic size of La-TCPP@DOX PMOF nanocrystals.

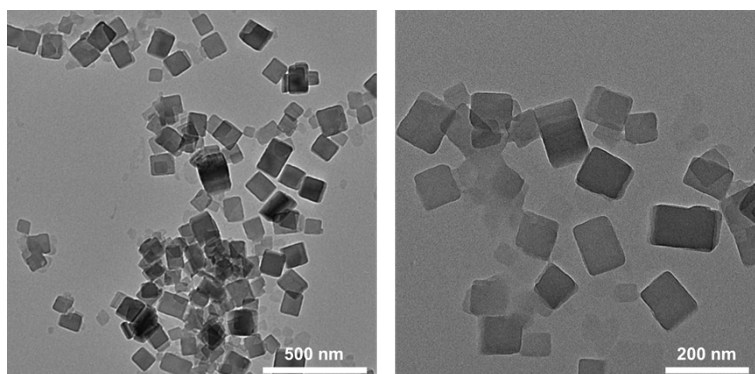

**Figure S9.** TEM images of La-TCPP PMOF obtained after mechanical stirring. It can be seen that the stirred PMOF nanocrystals have obvious lamellar detachment phenomenon, and the ultra-thin lamellar structure is relatively increased.

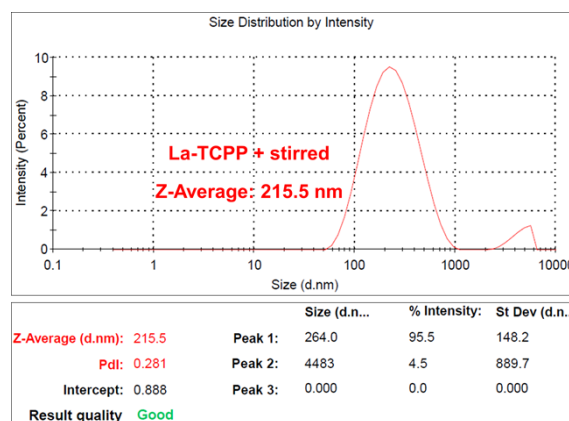

**Figure S10.** DLS analysis of the stirred La-TCPP PMOF nanocrystals.

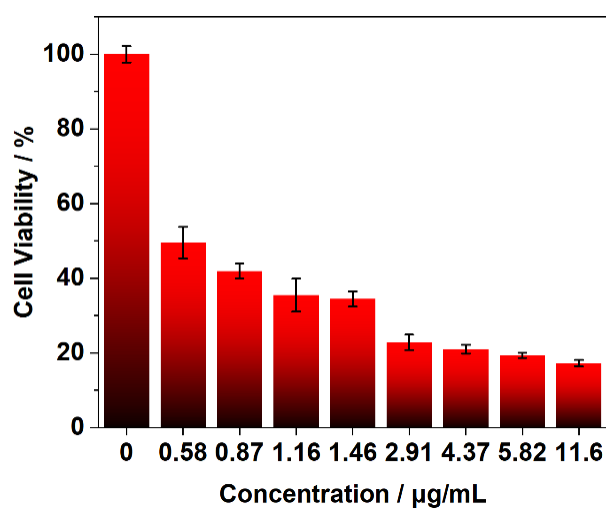

**Figure S11.** Cytotoxicity induced by free DOX in 4T1 cells.

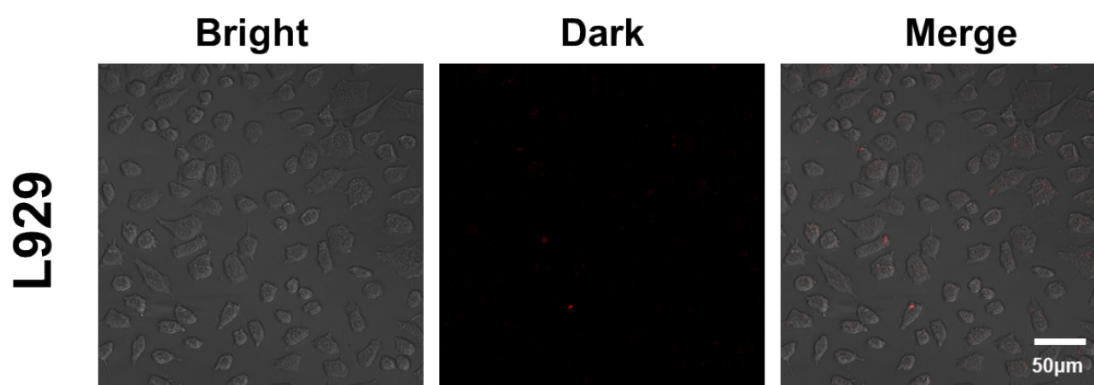

**Figure S12.** Cellular uptake of La-TCPP@DOX@Apt in L929 cells incubation with 6 hours.

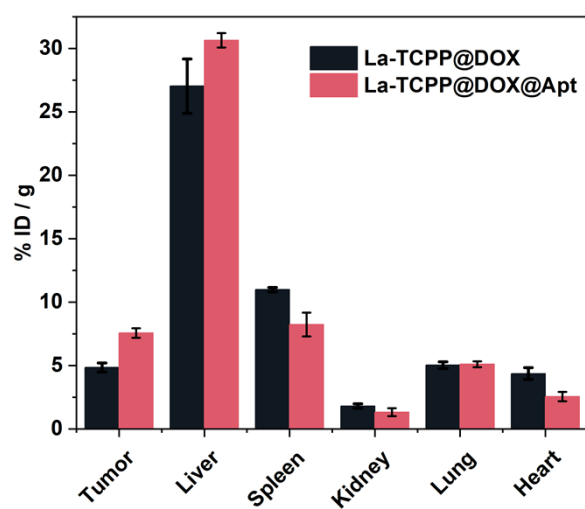

**Figure S13.** Histogram of biological distribution of La-TCPP@DOX and La-TCPP@DOX@Apt in major tissues of mice at 24 hours after injection.

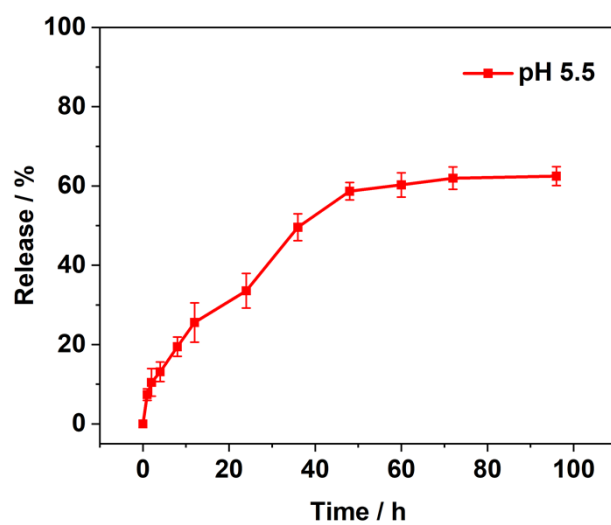

**Figure S14.** The release profiles of DOX in La-TCPP@DOX PMOF under pH 5.5 at 37 °C.
